# Supplementary material
Source: Royal Society of Chemistry journal article supplement (doi:10.1039/d6nj00300a)
Supplement: d6nj00300a1.pdf [file d6nj00300a1.pdf]

*Supporting Information*

## **Mechanically Durable, Superhydrophobic, and Flame-Retardant Wood Fabricated via Hierarchical Hybrid Solution Impregnation**

Xinyuan Wan,<sup>\*a</sup> Junyi Wang,<sup>a</sup> Biaohua Zhang,<sup>a</sup> Deyuan Lin,<sup>a</sup> Xiaojian Xia,<sup>a</sup> and Yiyang Chen<sup>a</sup>

<sup>a</sup> State Grid Fujian Electric Research Institute, Putian Coastal Atmospheric Environment Material Corrosion and Electric Power Equipment Safety Observation and Research Station of Fujian Province, Fuzhou 350007, China.

\* Correspondence: wanxinyuanscu@outlook.com;

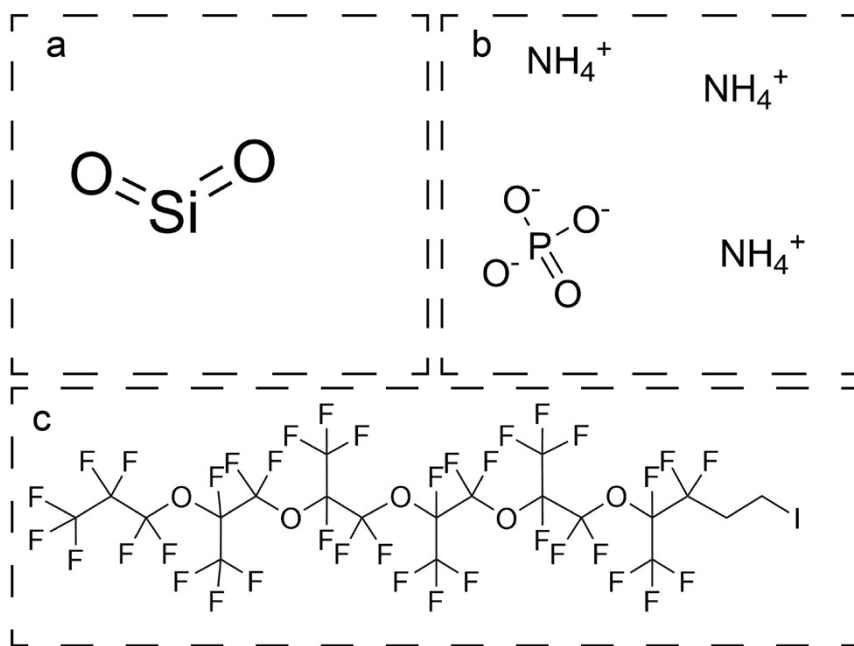

Figure S1. The chemical structural formulas of SiO<sub>2</sub> (a), APP (b) and PFDTES (c).

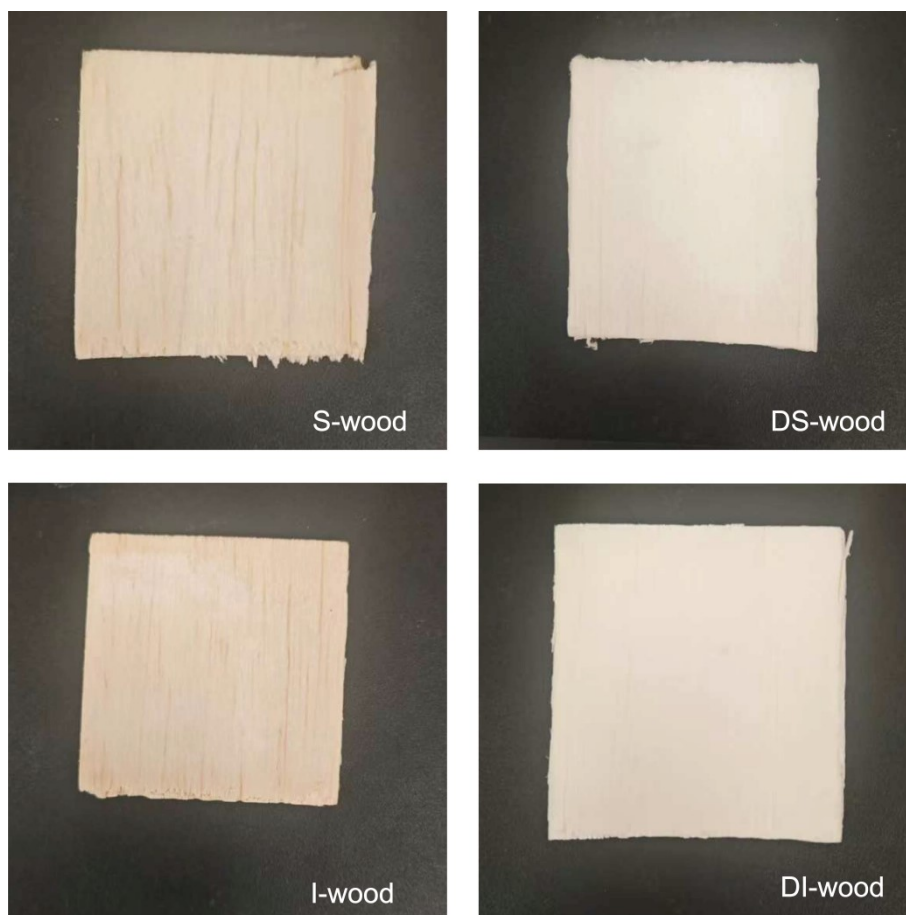

Figure S2. The optical photographs of wood sample.

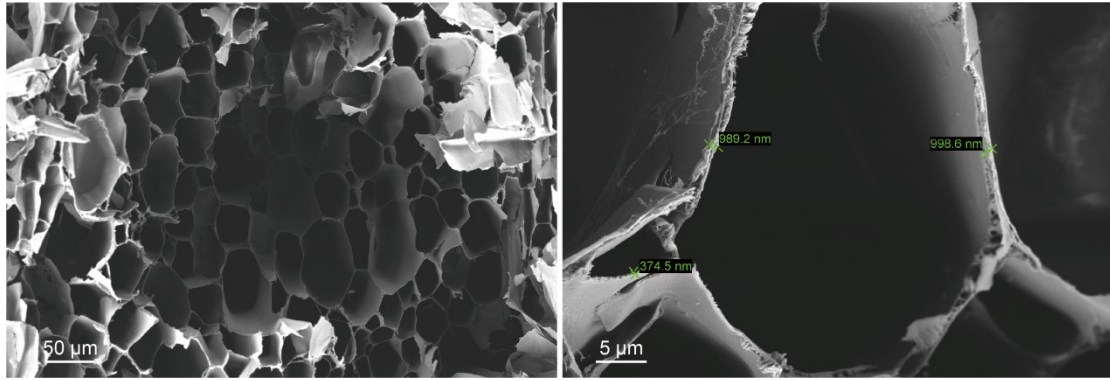

Figure S3. The SEM images of D-wood.

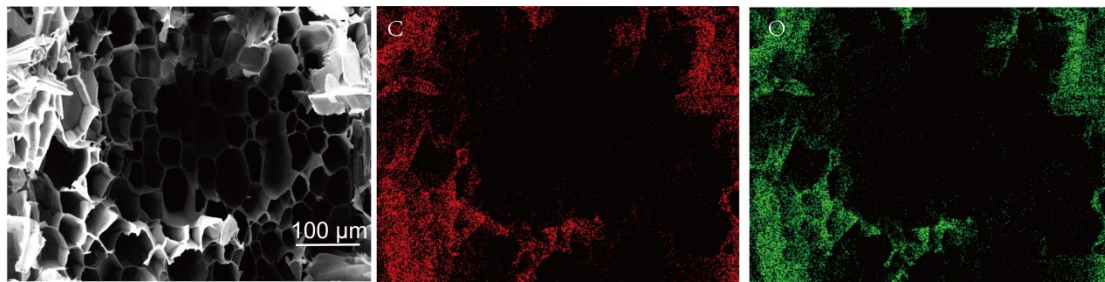

Figure S4. EDS mapping of D-wood.

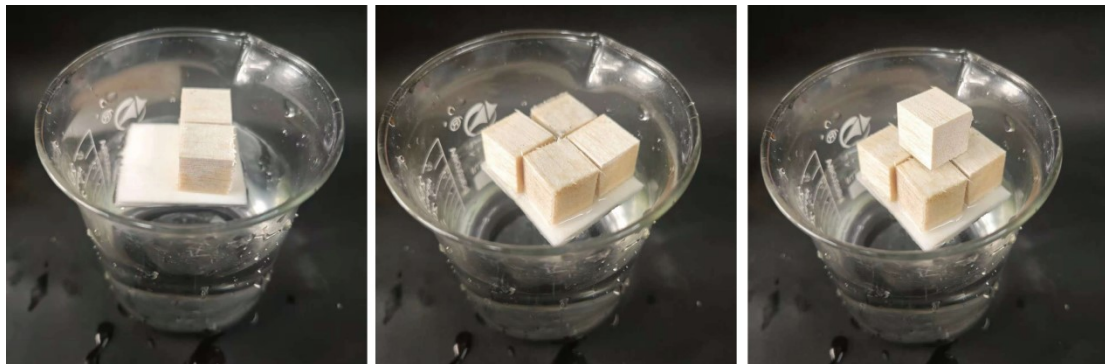

Figure S5. Digital photograph demonstrating the self-floating behavior of DI-wood.

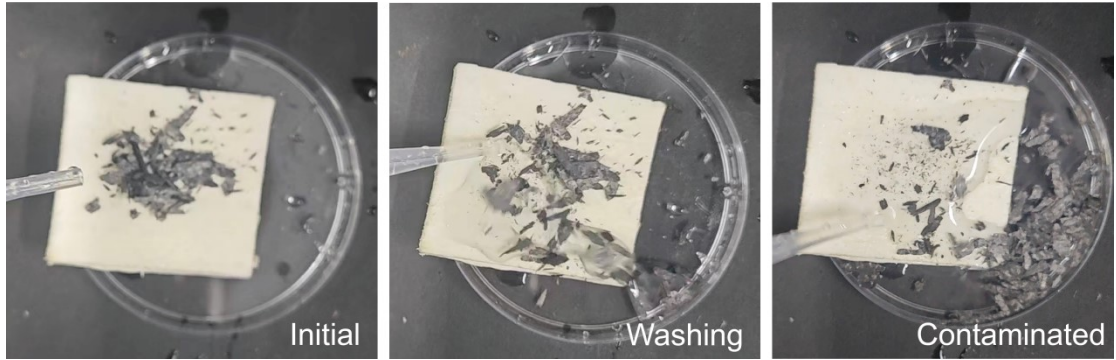

Figure S6. Self-cleaning test of DS-wood using continuous water droplets to rinse a surface contaminated with carbon particles.

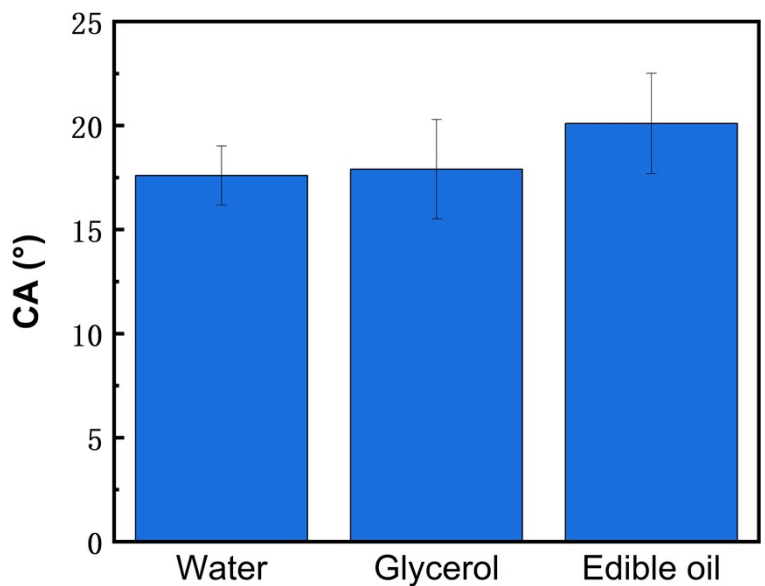

Figure S7. CA of DI-wood.

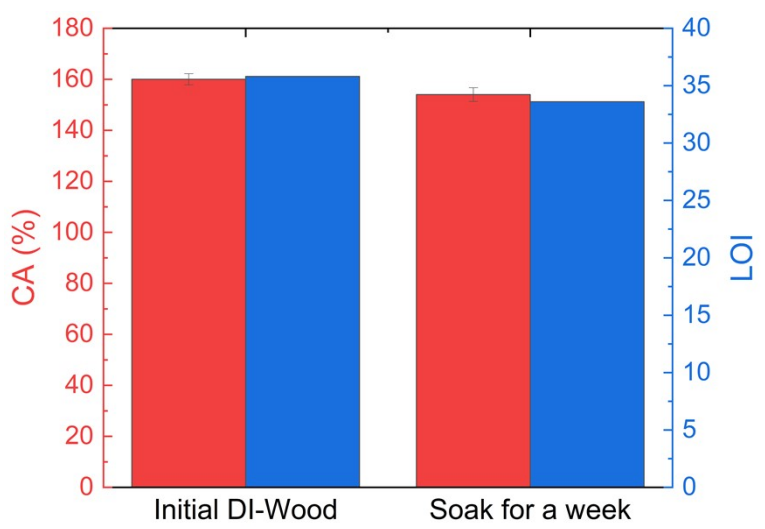

Figure S8. Immersion Resistance of DI Wood.

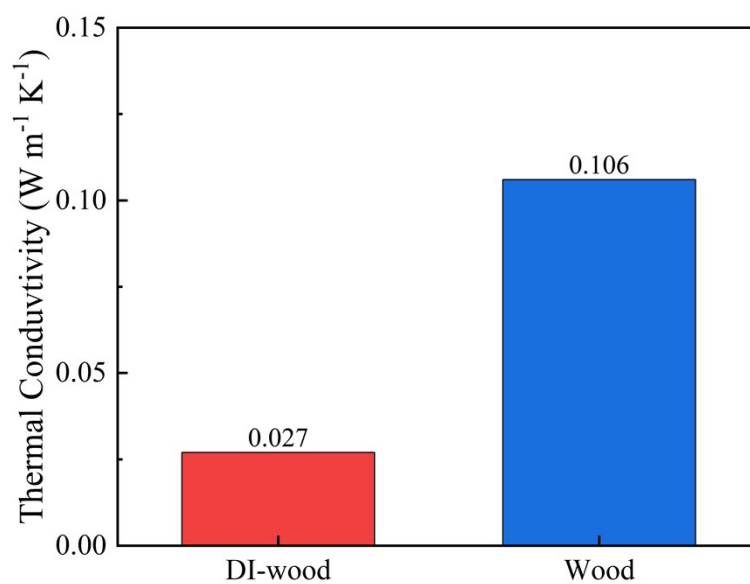

Figure S9. The thermal conductivity of DI-wood.

Table S1 the extent of the delignification of D-Wood

| Moisture Content (%) | Oven-dry Density (g cm <sup>-3</sup> ) | removal degree (%) |
|----------------------|----------------------------------------|--------------------|
| 12.8±1.5             | 0.118±0.008                            | 24.6±2.4           |

Table S2 elemental semi-quantitative results of DI-Wood

| Map Sum Spectrum | Element | Line Type | Weight % | Weight % Sigma | Atomic % |
|------------------|---------|-----------|----------|----------------|----------|
|                  | C       | K series  | 18.63    | 0.26           | 26.68    |
|                  | N       | K series  | 3.24     | 0.20           | 3.98     |
|                  | O       | K series  | 31.44    | 0.17           | 33.81    |
|                  | F       | K series  | 24.75    | 0.16           | 22.41    |
|                  | Si      | K series  | 16.09    | 0.09           | 9.86     |
|                  | P       | K series  | 5.85     | 0.06           | 3.25     |
|                  | Total   |           | 100.00   |                | 100.00   |
